# Supplementary material for: Analysis of Cellular Activity and Induction of Inflammation in Response to Short-Term Exposure to Cobalt and Chromium Ions in Mature Human Osteoblasts
Source: MDPI journal article supplement (doi:10.3390/ma12172771), 2019-08-28
Supplement: s1 [file s1]

Article

# Analysis of Cellular Activity and Induction of Inflammation in Response to Short-Term Exposure to Cobalt and Chromium Ions in Mature Human Osteoblasts

Anika Jonitz-Heincke <sup>1,\*</sup>, Marie-Luise Sellin <sup>1</sup>, Anika Seyfarth <sup>1</sup>, Kirsten Peters <sup>2</sup>, Brigitte Mueller-Hilke <sup>3</sup>, Tomas Fiedler <sup>4</sup>, Rainer Bader <sup>1</sup> and Annett Klinder <sup>1</sup>

<sup>1</sup> Biomechanics and Implant Technology Research Laboratory, Department of Orthopedics, Rostock University Medical Centre, Doberaner Strasse 142, Rostock 18057, Germany

<sup>2</sup> Department of Cell Biology, Rostock University Medical Center, Schillingallee 69, Rostock 18057, Germany

<sup>3</sup> Institute for Immunology, Rostock University Medical Center, Schillingallee 70, Rostock 18057, Germany

<sup>4</sup> Institute for Medical Microbiology, Virology and Hygiene, Rostock University Medical Center, Schillingallee 70, Rostock 18057, Germany

\* Correspondence: anika.jonitz-heincke@med.uni-rostock.de; Tel.: +49-381-494-9306

## Supplementary Figures

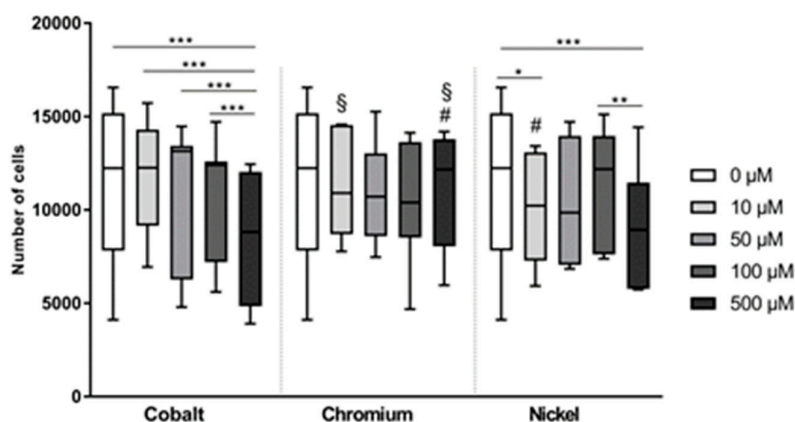

**Figure S1:** Cell numbers of human osteoblasts after exposure to metal salts. Untreated cells served as controls (0 µM). Osteoblasts were treated with different concentrations of Co(2+), Cr(3+) and Ni(2+) over 48 h. Afterwards cell number was determined via CyQUANT NF Cell Proliferation Assay. Data are depicted as box plots (n = 7). Significance was calculated with concentration-dependent differences: \*p < 0.05, \*\*p < 0.01, \*\*\*p < 0.001; differences to cobalt: \*p < 0.05; differences to nickel: §p < 0.05.

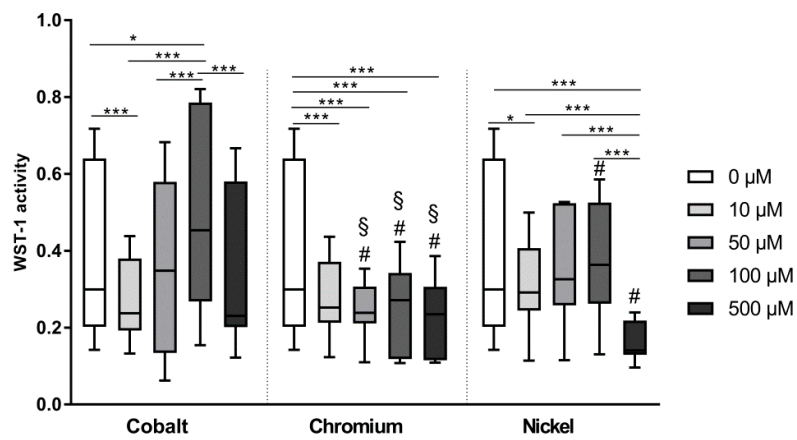

**Figure S2:** Metabolic activity of human osteoblasts after exposure to metal salts. Untreated cells served as controls (0 µM). Osteoblasts were treated with different concentrations of Co(2+), Cr(3+) and Ni(2+) over 48 h. Afterwards metabolic activity was determined via water soluble tetrazolium salt (WST-1) assay. Data are depicted as box plots (n = 7). Significance was calculated with concentration-dependent differences: \*p < 0.05, \*\*\*p < 0.001; differences to cobalt: #p < 0.05; differences to nickel: §p < 0.05.
